# Supplementary material
Source: publisher site journal article supplement (https://www.dovepress.com/article/596008)
Supplement: Supplementary file 1 [file 596008%20Revised%20Supplementary%20Figure%201.docx]

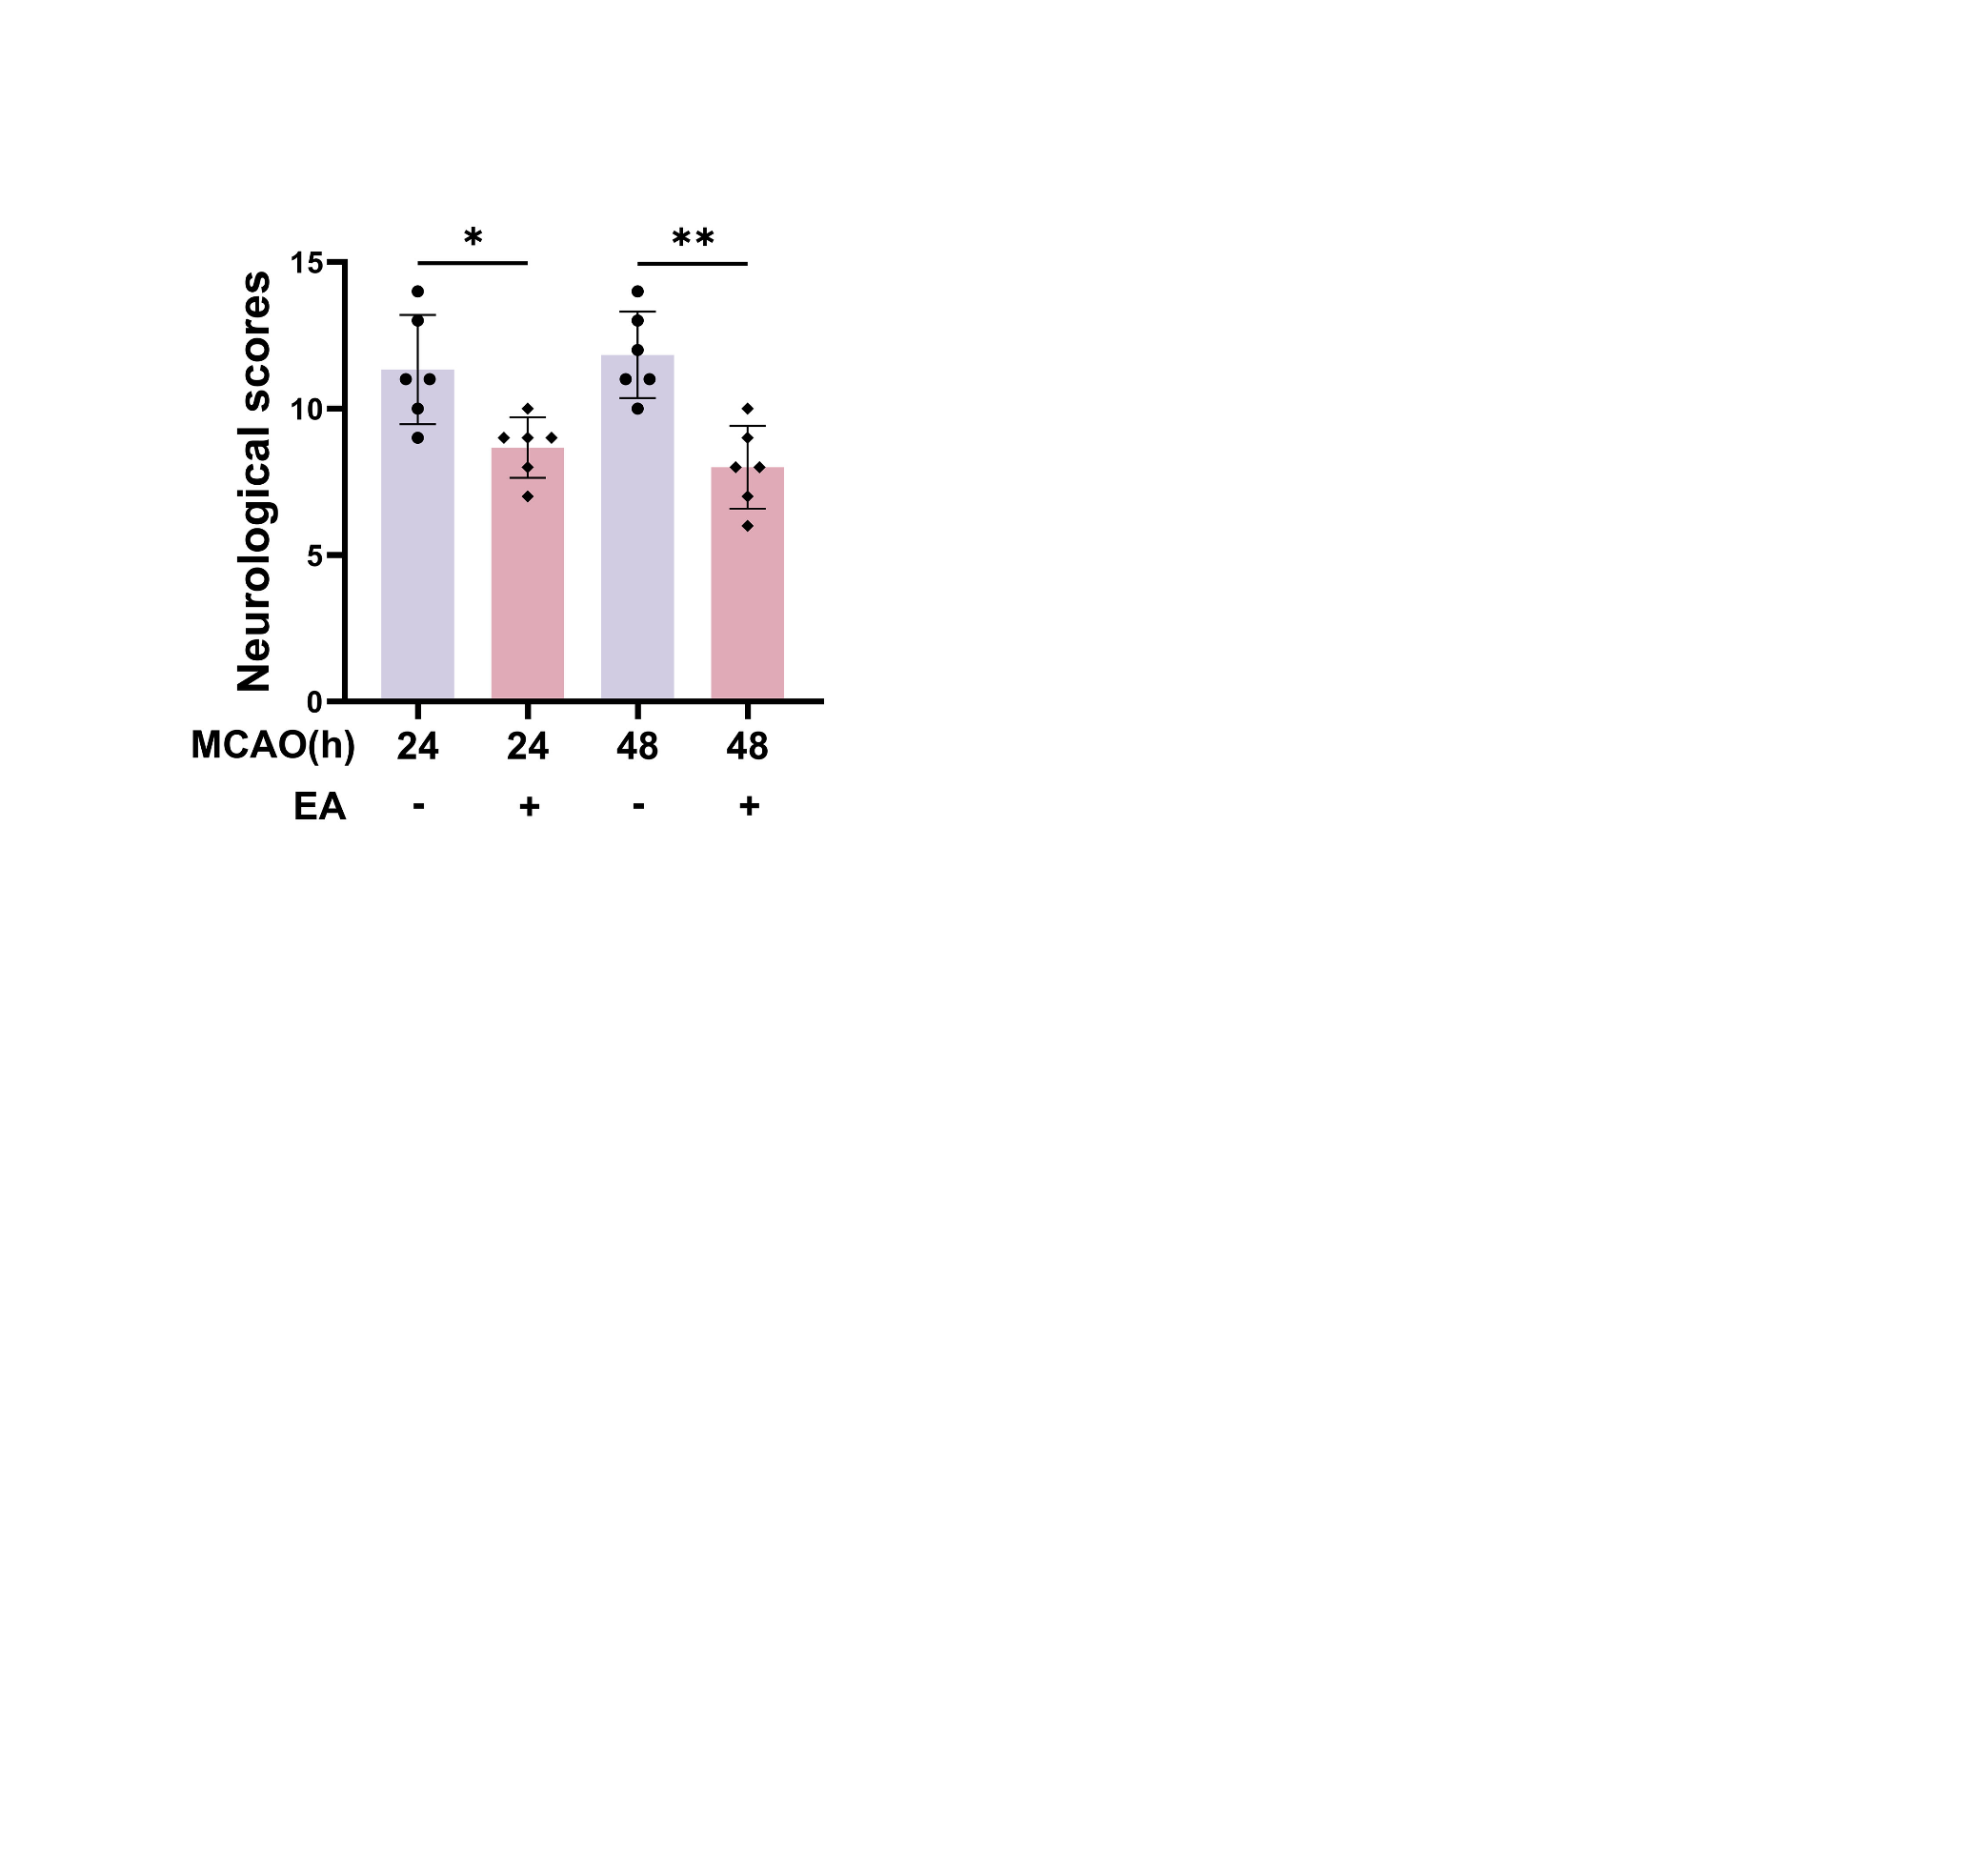
**Supplementary Figure 1** mNSS scores of MCAO mice at 24h and 48 h post-surgery.

The mNSS scores of the MCAO and MCAO+EA groups are shown. Measurement data were expressed as mean ± SD. **p* < 0.05, ***p* < 0.01.
